# Supplementary material
Source: publisher figshare collection journal article supplement (https://acs.figshare.com/ndownloader/files/4393507)
Supplement: Supplementary file 1 [file 4393507]

## Supporting Information

### A new unnatural base pair system between fluorophore and quencher base analogues for nucleic acid-based imaging technology

Michiko Kimoto<sup>1,2</sup>, Tsuneo Mitsui<sup>2</sup>, Rie Yamashige<sup>1</sup>, Akira Sato<sup>1</sup>, Shigeyuki Yokoyama<sup>1,3</sup>, and Ichiro Hirao<sup>1,2,\*</sup>

<sup>1</sup>RIKEN Systems and Structural Biology Center (SSBC) and <sup>2</sup>TagCyx Biotechnologies, 1-7-22 Suehiro-cho, Tsurumi-ku, Yokohama, Kanagawa 230-0045, Japan, <sup>3</sup>Department of Biophysics and Biochemistry, Graduate School of Science, The University of Tokyo, 7-3-1 Hongo, Bunkyo-ku, Tokyo 113-0033, Japan.

RECEIVED DATE (automatically inserted by publisher); ihirao@riken.jp

#### 1. Chemical synthesis of the Px nucleoside

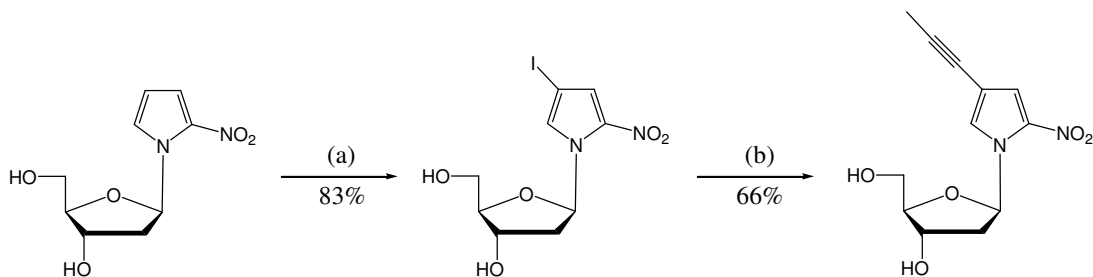

**Conditions:** (a) NIS, CH<sub>3</sub>CN (b) Pd(PPh<sub>3</sub>)<sub>2</sub>Cl<sub>2</sub>, DMF

#### General methods and materials

Reagents and solvents were purchased from standard suppliers and used without further purification. Reactions were monitored by thin-layer chromatography (TLC) using 0.25 mm silica gel 60 plates impregnated with 254 nm fluorescent indicator (Merck). <sup>1</sup>H NMR, and <sup>13</sup>C NMR spectra were recorded on a Bruker (300-AVM) magnetic

resonance spectrometer. Nucleoside purification was performed on a Gilson HPLC system with a preparative C18 column (Waters  $\mu$ -BONDASPHERE, 150  $\times$  19 mm). High resolution mass spectra (HRMS) were recorded on a JEOL JM 700 mass spectrometer.

#### **1-(2-Deoxy- $\beta$ -D-ribofuranosyl)-4-iodo-2-nitropyrrole**

A mixture of 1-(2-deoxy- $\beta$ -D-ribofuranosyl)-2-nitropyrrole (456 mg, 2 mmol) and *N*-iodosuccinimide (900 mg, 4 mmol) in CH<sub>3</sub>CN (8 ml) was stirred at room temperature for 14 h. The mixture was separated by ethyl acetate and water. The organic phase was dried with Na<sub>2</sub>SO<sub>4</sub>, and evaporated *in vacuo*. The residue was purified by silica gel column chromatography and RP-HPLC to give 1-(2-deoxy- $\beta$ -D-ribofuranosyl)-4-iodo-2-nitropyrrole (587 mg, 1.66 mmol, 83%).

<sup>1</sup>H NMR (300 MHz, DMSO-*d*<sub>6</sub>)  $\delta$  7.90 (d, 1H, *J* = 2.0 Hz), 7.40 (d, 1H, *J* = 2.0 Hz), 6.54 (t, 1H, *J* = 5.6 Hz), 5.27 (d, 1H, *J* = 4.3 Hz), 5.10 (t, 1H, *J* = 4.9 Hz), 4.23 (m, 1H), 3.83 (m, 1H), 3.53-3.85 (m, 2H), 2.18-2.45 (m, 2H). UV-vis spectral data in EtOH  $\lambda_{\text{max}}$  = 350 nm ( $\epsilon$  10500). HRMS (FAB, 3-NBA matrix) for C<sub>9</sub>H<sub>12</sub>IN<sub>2</sub>O<sub>5</sub> (M+H)<sup>+</sup> calcd 354.9791, found 354.9784.

#### **1-(2-Deoxy- $\beta$ -D-ribofuranosyl)-4-propynyl-2-nitropyrrole**

To a solution of 1-(2-deoxy- $\beta$ -D-ribofuranosyl)-4-iodo-2-nitropyrrole (354 mg, 1.0 mmol), dichloro bis(triphenylphosphine)palladium (35 mg, 0.05 mmol) in DMF (5 ml) was added tributyl(1-propynyl)tin (987 mg, 3.00 mmol). The mixture was heated at 100 °C for 30 min. The reaction mixture was separated by ethyl acetate and water. The organic phase was dried with Na<sub>2</sub>SO<sub>4</sub>, and evaporated *in vacuo*. The residue was

purified by silica gel column chromatography and RP-HPLC to give 1-(2-deoxy- $\beta$ -D-ribofuranosyl)-4-propynyl-2-nitropyrrole (177 mg, 0.66 mmol, 66%).

$^1\text{H}$  NMR (300 MHz,  $\text{DMSO-}d_6$ )  $\delta$  7.92 (d, 1H,  $J = 2.2$  Hz), 7.27 (d, 1H,  $J = 2.2$  Hz), 6.55 (t, 1H,  $J = 5.7$  Hz), 5.28 (d, 1H,  $J = 4.5$  Hz), 5.11 (t, 1H,  $J = 5.2$  Hz), 4.24 (m, 1H), 3.85 (m, 1H), 3.53-3.70 (m, 2H), 2.45 (m, 1H), 2.22 (m, 1H), 1.99 (s, 3H).  $^{13}\text{C}$  NMR (75 MHz,  $\text{DMSO-}d_6$ )  $\delta$  136.21, 129.17, 117.08, 105.29, 88.74, 88.30, 86.75, 72.91, 69.21, 60.83, 42.58, 4.29. UV-vis spectral data in EtOH  $\lambda_{\text{max}} = 226$  nm ( $\epsilon$  12700), 362 nm ( $\epsilon$  7450). HRMS (FAB, 3-NBA matrix) for  $\text{C}_{12}\text{H}_{15}\text{N}_2\text{O}_5$  ( $\text{M}+\text{H}$ ) $^+$  calcd 267.0981, found 267.0991.

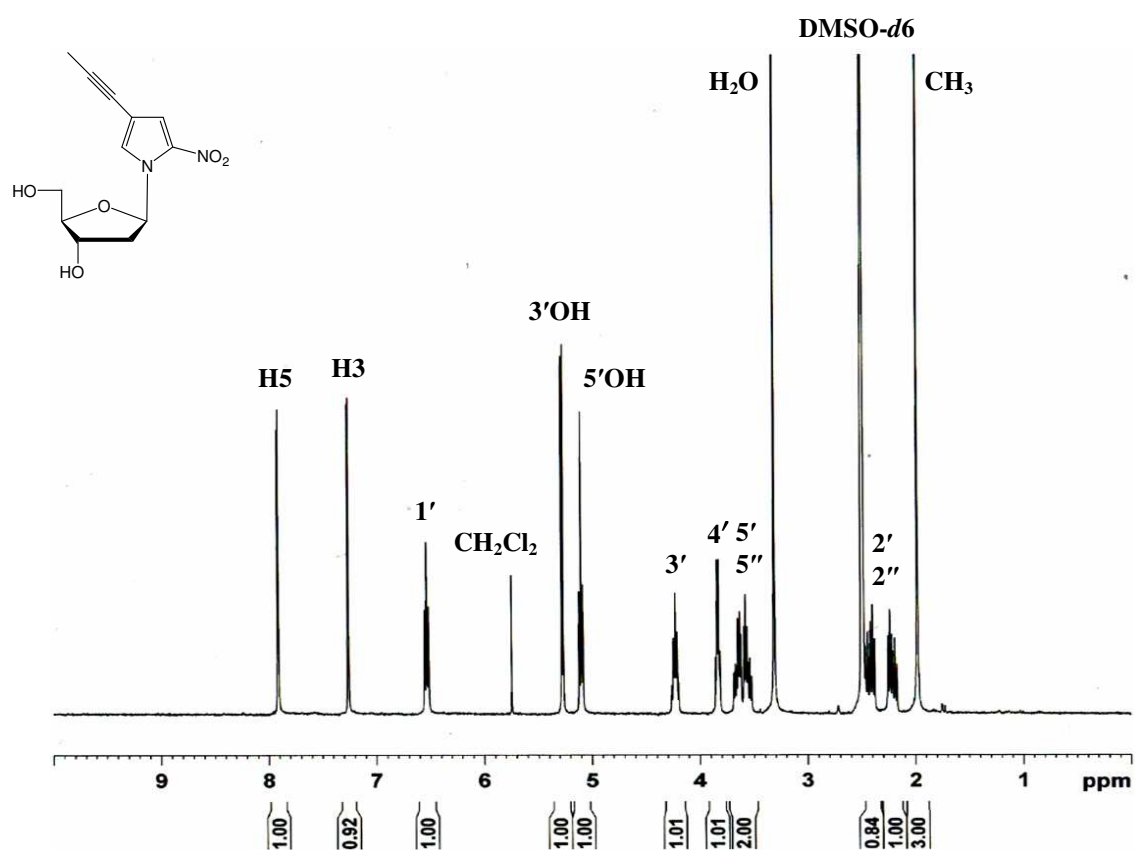

$^1\text{H}$  NMR (300 MHz,  $\text{DMSO-}d_6$ ) spectrum of 1-(2-deoxy- $\beta$ -D-ribofuranosyl)-4-propynyl-2-nitropyrrole (Px nucleoside).

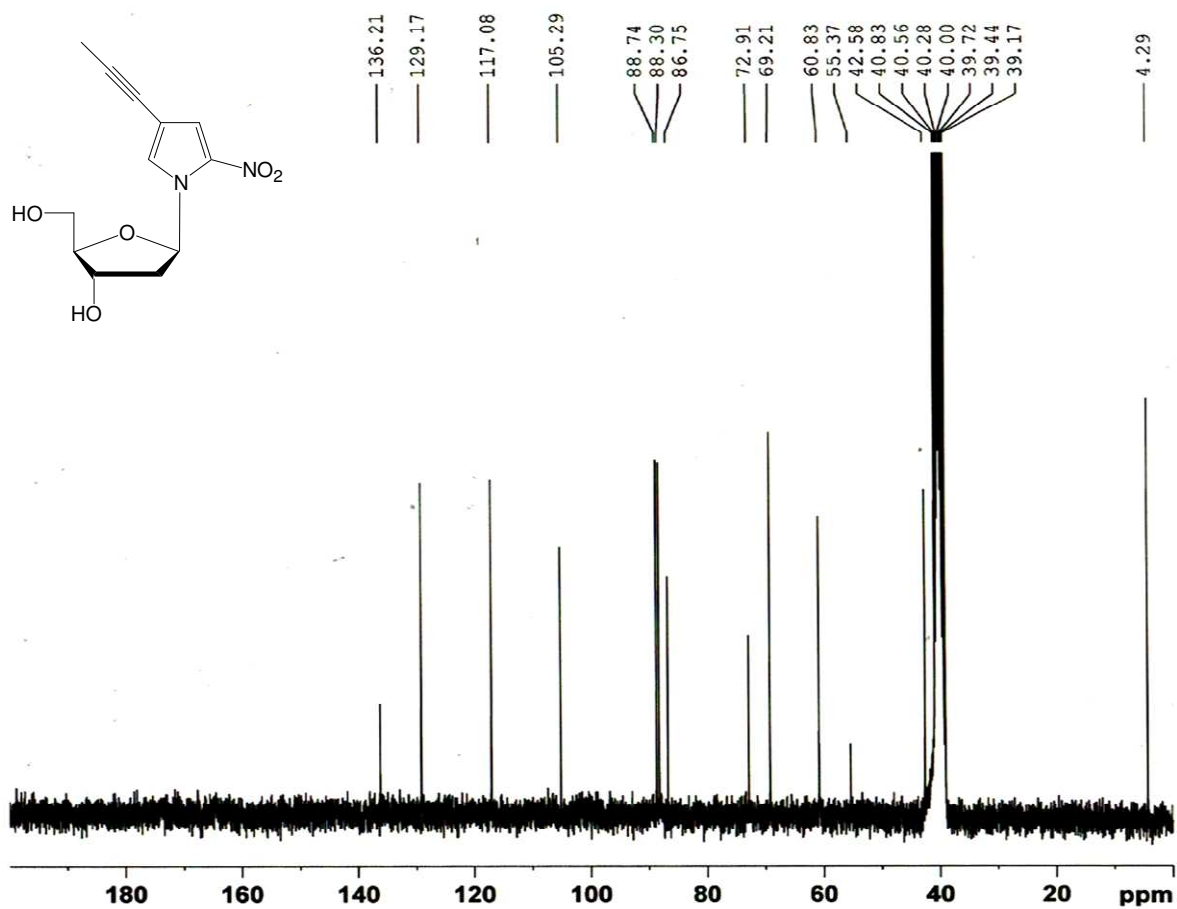

<sup>13</sup>C NMR (75 MHz, DMSO-*d*<sub>6</sub>) spectrum of 1-(2-deoxy-β-D-ribofuranosyl)-4-propynyl-2-nitropyrrole (Px nucleoside)

## 2. Quenching ability of 2-nitropyrrole derivatives to fluorescent Dss

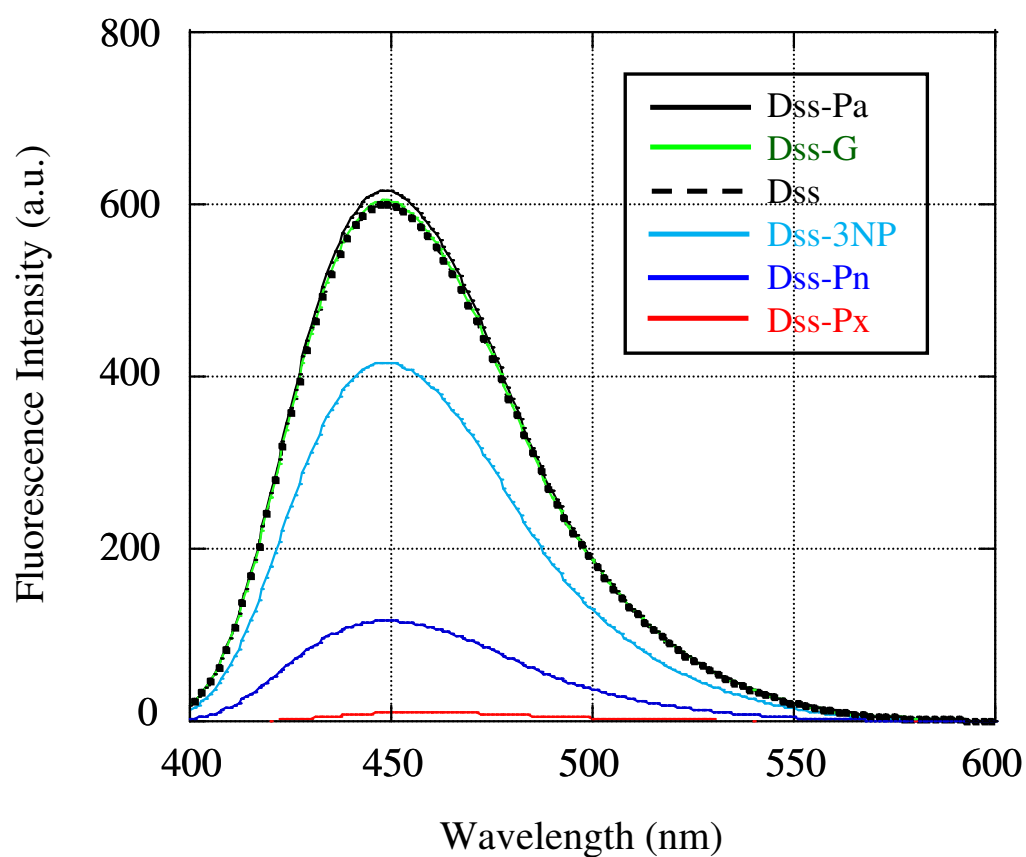

**Figure S1. Quenching ability of the 2'-deoxyribonucleosides of 2-nitropyrrole derivatives to the fluorescent Dss deoxyribonucleoside.**

The emission spectra of the 2'-deoxyribonucleoside of **Dss** (5  $\mu$ M) with **Pn**, **Px**, **Pa**, 3-nitropyrrole (3NP) or G (5 mM each) was monitored in a solution containing 10% CH<sub>3</sub>CN, 40% H<sub>2</sub>O, and 50% EtOH at the excitation wavelength of 385 nm at 25 °C.
